# Supplementary material for: In situ growth of CoNi bimetallic alloys inside polyetheretherketone-derived hierarchical porous carbon as a broadband and efficient electromagnetic wave absorber
Source: Royal Society of Chemistry journal article supplement (doi:10.1039/d2dt03239b), 2022-01-01
Supplement: d2dt03239b1.pdf [file d2dt03239b1.pdf]

## Supplementary information

### **In situ growth of CoNi bimetallic alloys inside polyetheretherketone-derived hierarchical porous carbon as a broadband and efficient electromagnetic wave absorber**

Pan Xu,<sup>a</sup> Lingcheng Meng,<sup>a</sup> Hongru He,<sup>a</sup> Desheng Qi,<sup>a</sup> Shan Wang,<sup>a</sup> Jiyong Fang,<sup>b\*</sup> Xigui Yue<sup>a\*</sup>

<sup>a</sup> Key Laboratory of High Performance Plastics, Ministry of Education. National and Local Joint Engineering Laboratory for Synthetic Technology of High Performance Polymer. College of Chemistry, Jilin University, 2699 Qianjin Street, Changchun 130012, P. R. China.

<sup>b</sup> Midea Corporate Research Center, Foshan 528311, P. R. China.

Corresponding author: Jiyong Fang; Xigui Yue

E-mail addresses: [fangjiyong1989@foxmail.com](mailto:fangjiyong1989@foxmail.com); [yuexigui@jlu.edu.cn](mailto:yuexigui@jlu.edu.cn)

### SI-1: The characterization section

The component information of the samples was verified by X-ray diffraction (XRD, PANalytical B.V. Empyrean system, Cu K $\alpha$ , 10°–95°), Raman spectroscopy (LabRAM HR Evolution, Horiba, 523 nm laser), X-ray photoelectron spectroscopy (XPS, ESCALAB 250Xi), thermogravimetric analysis (TGA, PerkinElmer) and energy dispersion X-ray spectrometry (EDS, Oxford X-Max system). The morphologies of synthetic materials were determined by scanning electron microscopy (SEM, Nova Nano 450, field emission) and transmission electron microscopy (TEM, JEM-1200EX). The pore structure of the products was characterized by nitrogen adsorption and desorption experiment (Micromeritics ASAP 2020). The magnetic property of the products was measured on a vibrating sample magnetometer (VSM, SQUID, 298 K). The electromagnetic parameters (complex permeability and permittivity) were obtained on a network analyzer (85054D PNA-X, Agilent, toroidal shapes samples with 30 wt% of products in a paraffin wax matrix, coaxial method, frequency range: 2.00–18.00 GHz). The reflection loss (RL) of samples was calculated based on the transmission line theory.

$$RL = 20\lg |(Z_{in} - Z_0)/(Z_{in} + Z_0)| \quad (S1)$$

$$Z_{in} = Z_0 \sqrt{\mu_r/\epsilon_r} \tanh[j(2\pi fd/c)\sqrt{\mu_r\epsilon_r}] \quad (S2)$$

among them,  $Z_{in}$  is the normalized input impedance of absorption layer,  $Z_0$  refers to the impedance of free space,  $\epsilon_r$  and  $\mu_r$  refer to the relative complex permeability and the complex permittivity, respectively,  $f$ ,  $d$  and  $c$  stand for the frequency of EMW, the thickness of an absorber, and the velocity of EMW in free space, respectively.

## SI-2: The synthesis and characteristic viscosity measurement of PEEK/NaCl and PEEK

605.45 g Diphenyl sulfone and 196.38 g 4,4'-difluorobenzophenone were placed in a 1000 mL three-necked flask, melted, and raised to 180 °C under the protection of high purity N<sub>2</sub>. Then 99.10 g hydroquinone and 114.47 g Na<sub>2</sub>CO<sub>3</sub> were added, and the mixture was slowly heated to 250 °C and kept for 30 min. After that, the reaction temperature was raised to 320 °C and kept for 3 h. After that 9.82 g 4, 4-difluorophenone was added to seal the end, and then 259.48 g NaCl was added after thorough stirring, the product was quickly poured into the prepared mold and cooled to room temperature. Finally, the diphenyl sulfone was removed by Soxhlet extraction using acetone as solvent and the product obtained was named PEEK/NaCl after natural drying. For comparison, the same preparation method was used and the product without the addition of NaCl was denoted as PEEK. The reaction equation of polymer synthesis is as follows.

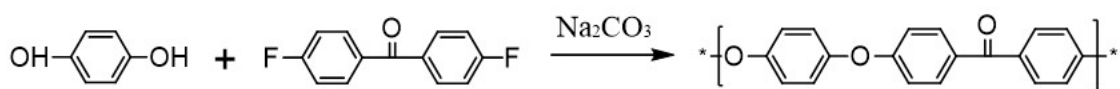

The reactive molecular formula of PEEK

The characteristic viscosity ( $[\eta]$ ) of PEEK/NaCl and PEEK was determined by eqn.1. The pure solvent efflux time ( $t_0$ ) and the PEEK solution efflux time ( $t$ ) were measured with a Ubbelohde viscometer. In eqn.S3, the relative viscosity  $\eta_r = t/t_0$  and C is the concentration of the solution to be measured.

$$[\eta] = [(\ln \eta_r)/C] \times \eta_r^{1/9} \quad (\text{S3})$$

In this experiment, C (sulphuric acid solution) for all three samples was 0.50 g/dl, the water bath temperature ( $25 \text{ }^\circ\text{C} \pm 0.2 \text{ }^\circ\text{C}$ ), and the capillary diameter of the Ubbelohde viscometer was 0.8 mm. The characteristic viscosity of PEEK/NaCl and PEEK was 1.06 g/dl.

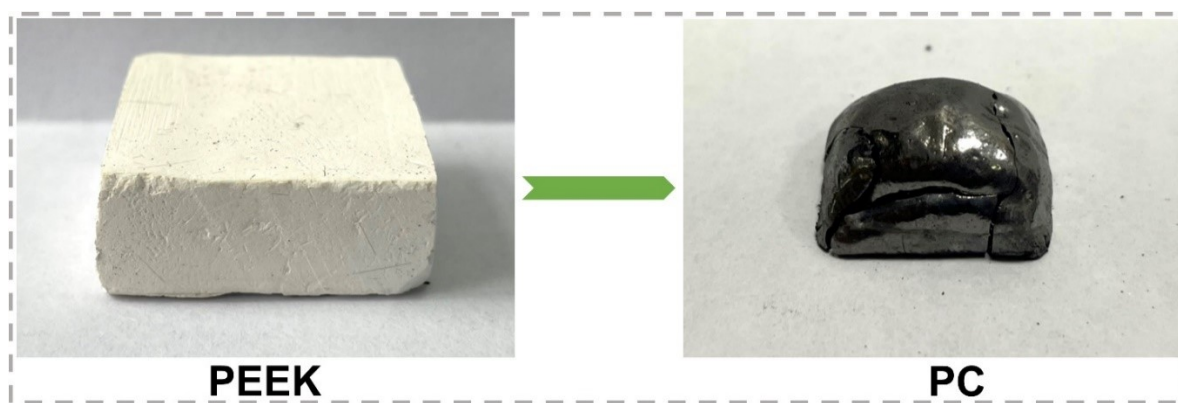

**Fig. S1** Digital photos of the process from PEEK to PC.

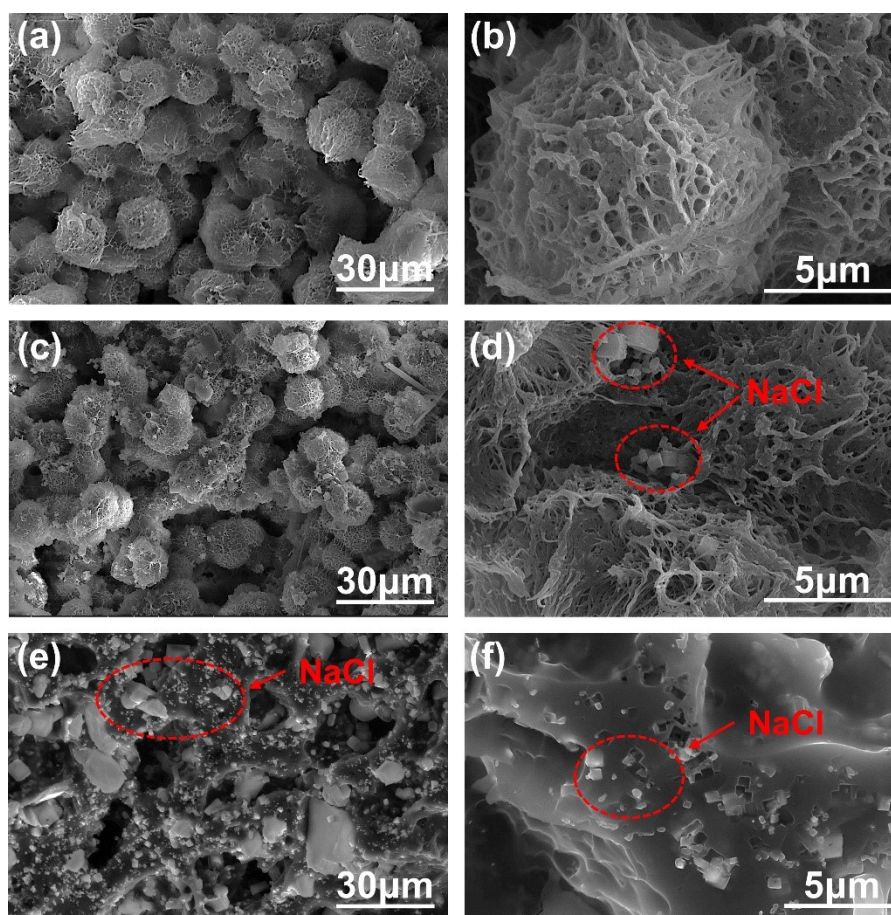

**Fig. S2** The SEM image of cross-sectional view of (a, b) PEEK, (c, d) PEEK/NaCl, and (e, f) PCP/NaCl.

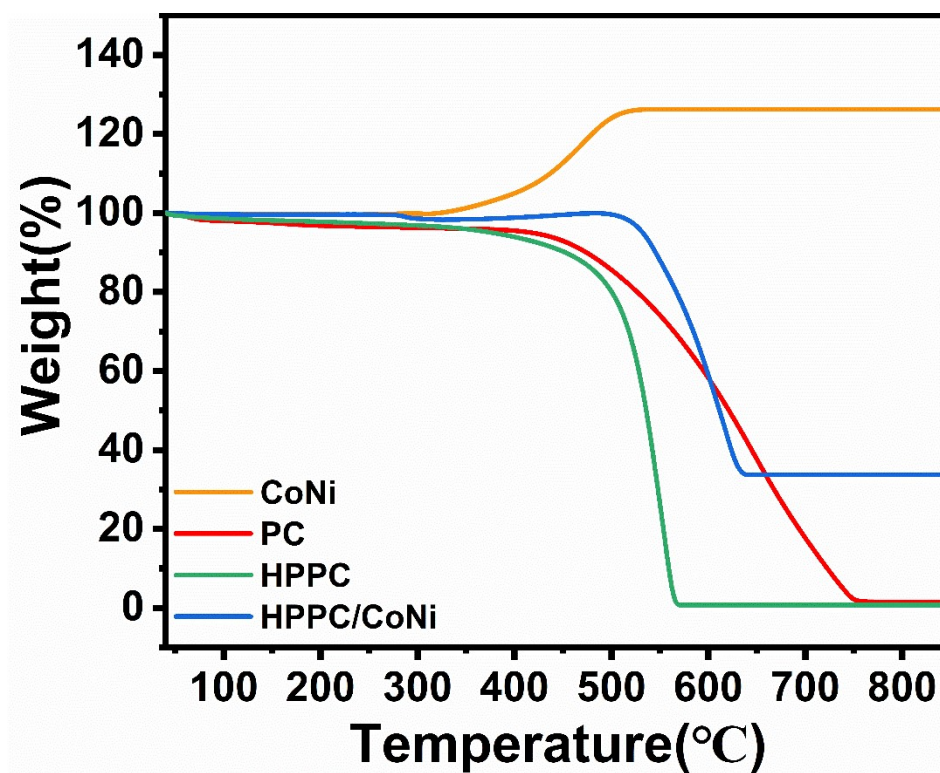

**Fig. S3** TGA curves of CoNi, PC, HPPC, and HPPC/CoNi in air.

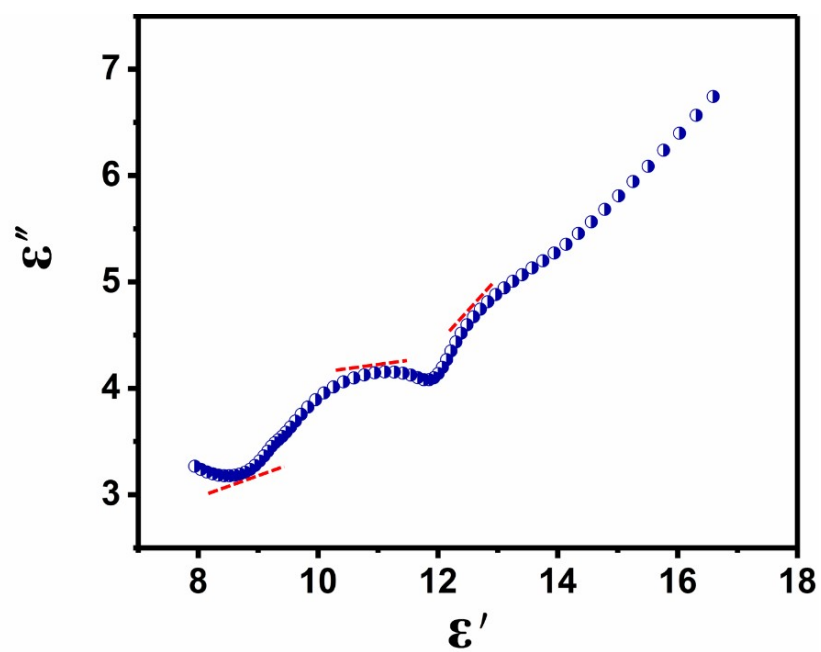

**Fig. S4** Cole–Cole plots of HPPC/CoNi.

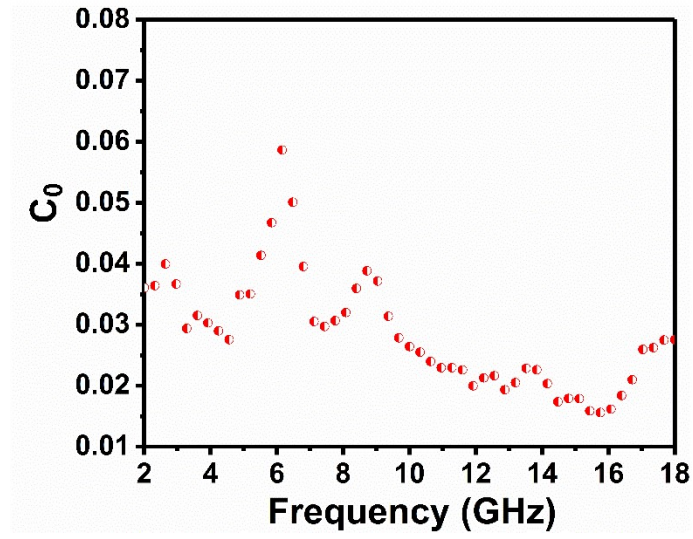

**Fig. S5** The value of the eddy current  $C_0 (\mu''(\mu')^{-2}f')$  of HPPC/CoNi.

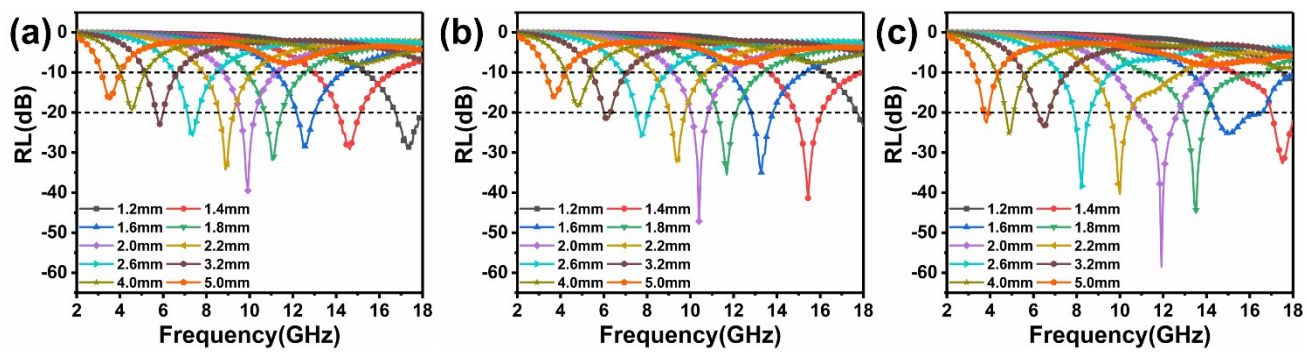

**Fig. S6** 2D absorption spectrum of (a) PC, (b) HPPC, and (c) HPPC/CoNi.

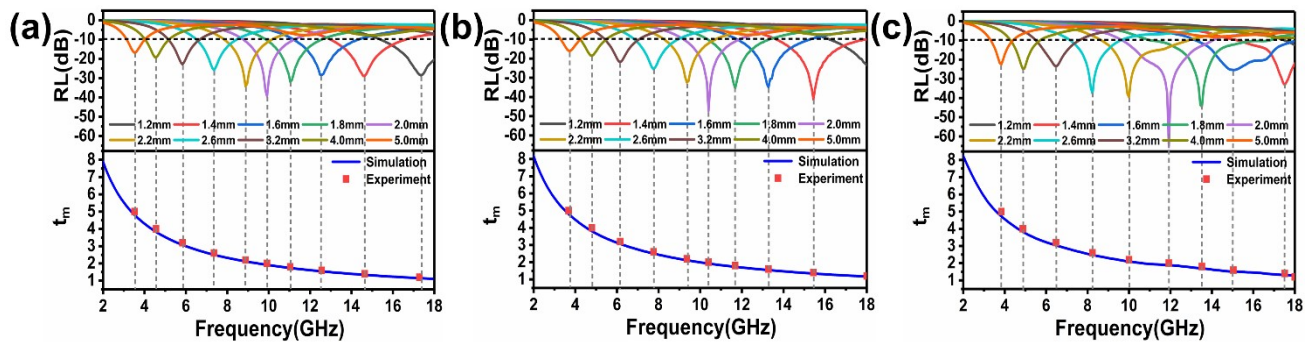

**Fig. S7** The RL–Frequency curves and the relationship between simulation thickness and peak frequency of (a) PC, (b) HPPC, and (c) HPPC/CoNi in 2.00–18.00 GHz.

**Table S1** The EMW absorption performance of polymer carbon-based composite absorbers

| Absorber                                                                        | $RL_{min}$<br>(dB) | Thickness<br>(mm) | EAB<br>(GHz) | Frequency<br>(GHz) | Ref       |
|---------------------------------------------------------------------------------|--------------------|-------------------|--------------|--------------------|-----------|
| Co/C                                                                            | −42.43             | 2.65              | 3.94         | 8.46–12.40         | [44]      |
| Porous C/Ni                                                                     | −47.60             | 1.75              | 3.80         | 12.00–15.80        | [39]      |
| WPC/MNPs-80                                                                     | −47.90             | 2.20              | 5.20         | 12.80–18.00        | [45]      |
| CuNi /Carbon foam                                                               | −50.20             | 1.60              | —            | —                  | [46]      |
| Dopamine-derived cavities<br>/Fe <sub>3</sub> O <sub>4</sub> /SA-derived carbon | −50.80             | 1.50              | 3.52         | 14.48–18.00        | [47]      |
| Co/Si/C/N700                                                                    | −50.90             | 1.90              | 5.72         | 12.28–18.00        | [43]      |
| Co/CNTs/CS                                                                      | −51.20             | 2.20              | 5.30         | 12.70–18.00        | [23]      |
| MnO@CNWs                                                                        | −55.00             | 2.00              | 6.20         | —                  | [48]      |
| Ni/NiP@NC                                                                       | −56.10             | 1.30              | 4.30         | 13.70–18.00        | [28]      |
| Fe <sub>3</sub> C/N-doped carbon                                                | −57.90             | 4.10              | 2.20         | 4.80–7.00          | [4]       |
| PPC/CoNi                                                                        | −65.56             | 2.00              | 5.92         | 10.96–16.88        | This work |
